# Supplementary material for: Classical Examples of the Concept of the ASIA Syndrome
Source: MDPI journal article supplement (doi:10.3390/biom10101436), 2020-10-12
Supplement: s1 [file s1]

# Supplementary materials

*Review*

## Classical Examples of the Concept of the ASIA Syndrome

Vânia Borba <sup>1</sup>, Anna Malkova <sup>2</sup>, Natalia Basantsova <sup>2</sup>, Gilad Halpert <sup>1,3</sup>, Laura Andreoli <sup>4,5</sup>, Angela Tincani <sup>4,5,6</sup>, Howard Amital <sup>1,3</sup>, and Yehuda Shoenfeld <sup>1,2,3,\*</sup>

<sup>1</sup> Zabludowicz Center for Autoimmune Diseases, Sheba Medical Center, 5265601 Tel-Hashomer, Israel

<sup>2</sup> Laboratory of the Mosaic of Autoimmunity, Saint Petersburg State University, Saint-Petersburg, Russian Federation

<sup>3</sup> Sackler Faculty of Medicine, Tel-Aviv University, Tel-Aviv, Israel

<sup>4</sup> Department of Clinical and Experimental Sciences, University of Brescia, Brescia, Italy

<sup>5</sup> Rheumatology and Clinical Immunology, ASST Spedali Civili, Brescia, Italy

<sup>6</sup> Sechenov First Moscow State Medical University of the Ministry of Health of the Russian Federation

\* Correspondence: shoenfel@post.tau.ac.il

Received: 17 July 2020; Accepted: 25 September 2020; Published: 12 October 2020

**Table S1.** HLA genotypes influencing sarcoidosis clinical presentation and prognosis.

| HLA Genotype                       | Disease Characteristics                 | Ref.       |
|------------------------------------|-----------------------------------------|------------|
| DRB1*01/04, DRB1*03:01, B08        | Acute course, Löfgren's syndrome        | 22,128,129 |
| DRB1*01, DRB1*03                   | Löfgren's syndrome, favorable prognosis | 131,132    |
| DRB1*03, DQB1*02:01                | Acute course, favorable prognosis       | 133,134    |
| DRB1*15, DQB1*06:02                | Chronic course                          | 133,134    |
| DRB1*07, DRB1*14, DRB1*15          | Chronic course, poor prognosis          | 131        |
| DRB1*04/15, DRB1*12/14, DRB1*14:01 | Chronic course, extra-pulmonary lesions | 130        |

**Table S2.** Summary of major animal studies of probiotic interventions, their mechanism of action and their outcomes related to ASD.

| Shared Features Between UCTD and ASIA                                                    | Main Findings                                                                                                                                                                                                                                        |
|------------------------------------------------------------------------------------------|------------------------------------------------------------------------------------------------------------------------------------------------------------------------------------------------------------------------------------------------------|
| (A) UCTD patients had more environmental exposures to adjuvants as compared to controls. | UCTD were significantly more exposed to: (1) tetanus vaccination; (2) HBV vaccination; (3) metal implants; (4) proximity to metal factories and foundries (home located less than 1 km). Cigarette smoking and allergies were more frequent in UCTD. |
| (B) Half of UCTD exposed to major ASIA triggers.                                         | Fifty-seven percent of patients with UCTD had been exposed to either vaccines containing adjuvants or silicone implants.                                                                                                                             |
| (C) UCTD exposed to major ASIA triggers displayed typical features of ASIA.              | As compared with non-exposed UCTD patients, those exposed to major ASIA triggers displayed more frequently general weakness, chronic fatigue, irritable bowel syndrome.                                                                              |
| (D) UCTD exposed to major ASIA triggers had familiarity for autoimmunity.                | As compared with non-exposed UCTD patients, those exposed to major ASIA triggers had more frequently first-degree relatives with autoimmune diseases (56% vs. 33%).                                                                                  |

**Table S3.** Summary of major clinical studies of probiotic interventions, their mechanism of action and their outcomes related to ASD.

|                                                                                                            |
|------------------------------------------------------------------------------------------------------------|
| <b>Major criteria</b>                                                                                      |
| Exposure to an external stimulus (infection, vaccine, silicone, adjuvant) prior to clinical manifestations |
| Appearance of “typical” clinical manifestations                                                            |
| Myalgia, myositis, or muscle weakness                                                                      |
| Arthralgia and/or arthritis                                                                                |
| Chronic fatigue, un-refreshing sleep, or sleep disturbances                                                |
| Neurological manifestations (especially associated with demyelination)                                     |
| Cognitive impairment, memory loss                                                                          |
| Pyrexia, dry mouth                                                                                         |
| Removal of inciting agent induces improvement                                                              |
| Typical biopsy of involved organs                                                                          |
| <b>Minor criteria</b>                                                                                      |
| Appearance of autoantibodies or antibodies directed at the suspected adjuvant                              |
| Specific HLA (i.e., HLA DRB1, HLA DQB1)                                                                    |
| Evolution of an autoimmune disease (i.e., multiple sclerosis, systemic sclerosis)                          |
| Other clinical manifestations (i.e., irritable bowel syn.)                                                 |
